# Supplementary material
Source: PubMed Central journal article supplement (PMC4197823)
Supplement: NIHMS587583-supplement-1.pdf [file NIHMS587583-supplement-1.pdf]

## Supplemental Figures

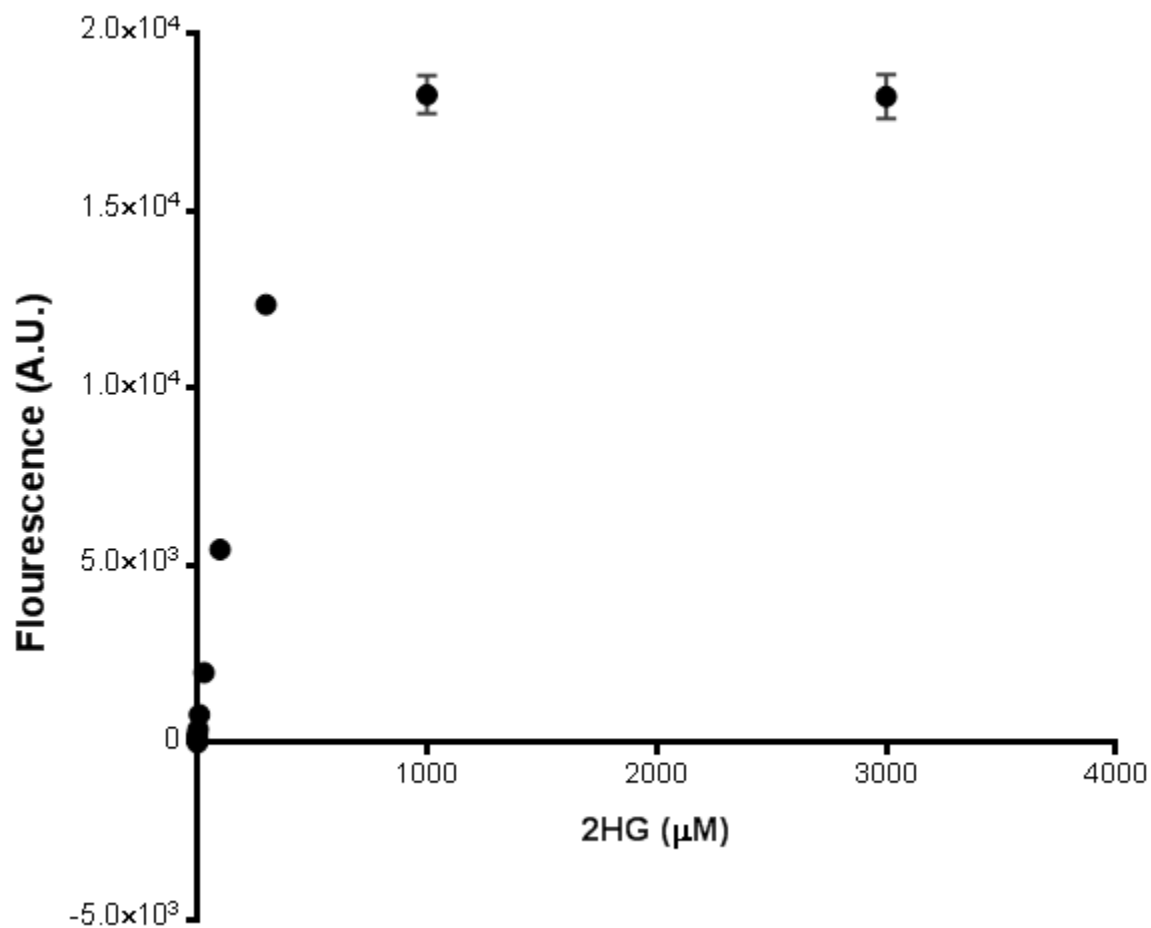

**Figure S1.** 2HG titration curve using coupled fluorimetric assay. A 20 μL aliquot of 2HG pulsed into media was quantified by fluorescence following acid-base neutralization. Assay signal saturates at 2HG concentrations of 1 mM. Fluorescence is plotted as Arbitrary Units (A.U.).
