# Supplementary material
Source: PubMed Central journal article supplement (PMC4197823)
Supplement: NIHMS587583-supplement-2.pdf [file NIHMS587583-supplement-2.pdf]

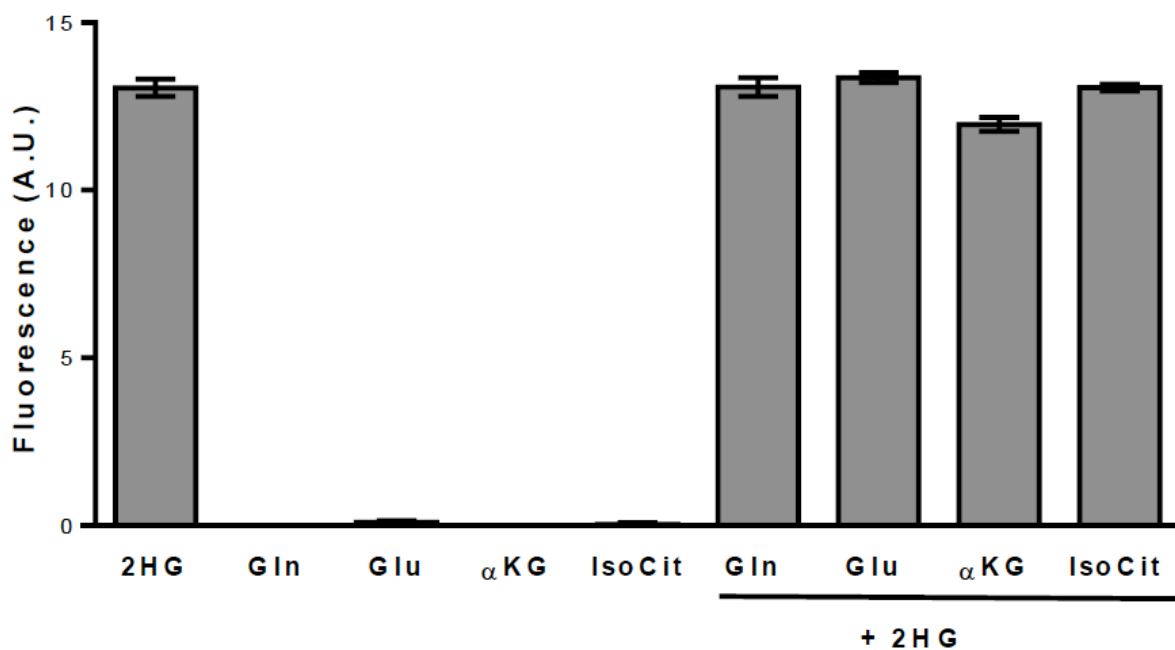

**Figure S2.** The coupled fluorimetric assay activity is unaffected by metabolites upstream of 2HG. Physiologic concentrations of metabolites upstream of 2HG and part of the glutamine metabolic pathway were assayed alone or in the presence of 2HG at physiologic concentrations (2HG 1 mM, Glutamine 4 mM, Glutamate 4 mM, Isocitrate 50  $\mu$ M, and  $\alpha$ -Ketoglutarate 100  $\mu$ M).
