# Supplementary material
Source: PubMed Central journal article supplement (PMC4197823)
Supplement: NIHMS587583-supplement-3.pdf [file NIHMS587583-supplement-3.pdf]

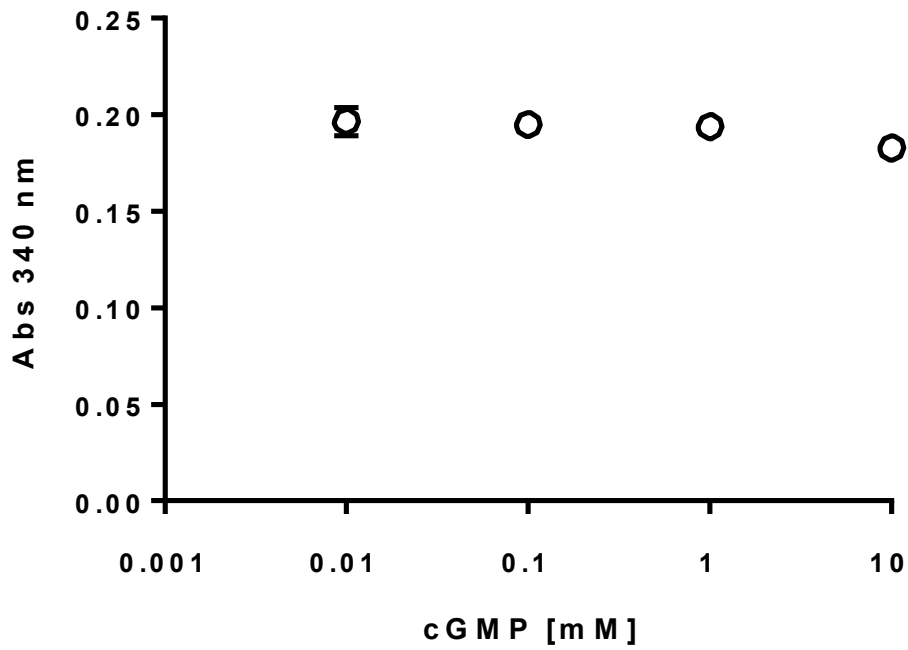

**Figure S3.** cGMP does not inhibit GLS activity. Enzyme activity of purified, full length, human glutaminase treated with increasing amounts of cGMP in the presence of 10 mM glutamine.
