# Supplementary material
Source: PubMed Central journal article supplement (PMC4197823)
Supplement: NIHMS587583-supplement-4.pdf [file NIHMS587583-supplement-4.pdf]

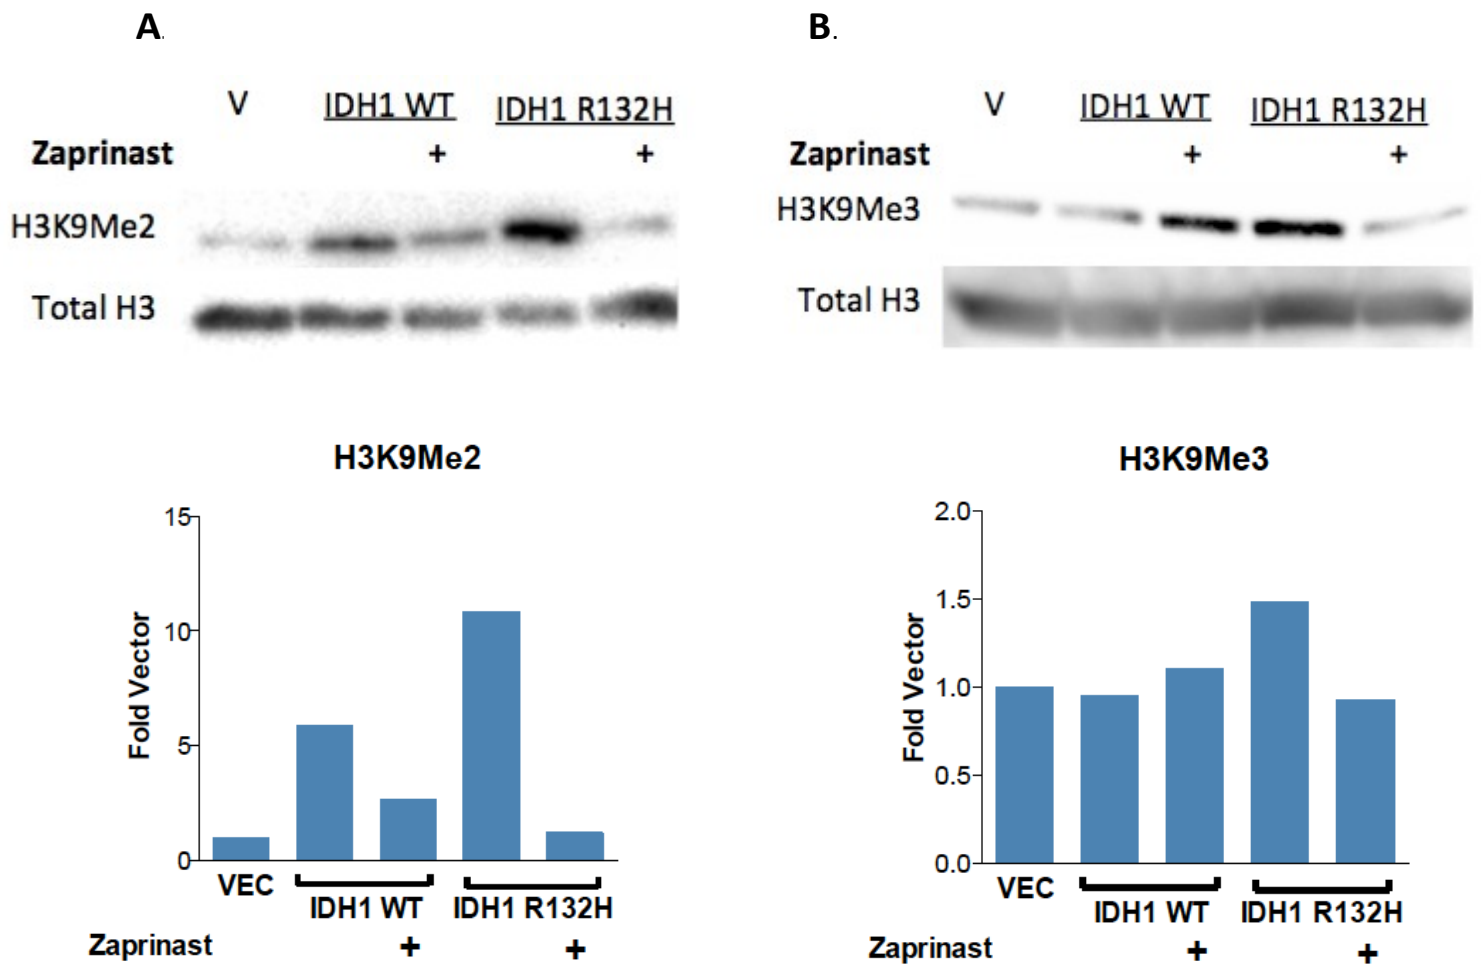

**Figure S4.** Effect of Zaprinast on histone methylation. Immortalized NHA cells were transduced with vector, wild type IDH1, or IDH1 R132H plasmids and treated with vehicle or 300  $\mu$ M Zaprinast. Histone extraction was then performed. Western blot was performed to assess the levels of histone lysine residues H3K9Me2 (A) and H3K9Me3 (B) (top) with band quantification (bottom).
