# Supplementary material
Source: PubMed Central journal article supplement (PMC4197823)
Supplement: NIHMS587583-supplement-5.pdf [file NIHMS587583-supplement-5.pdf]

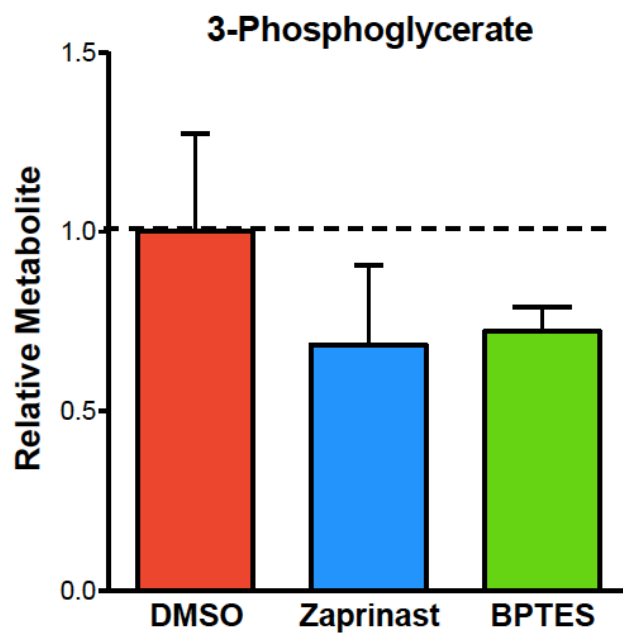

**Figure S5.** Effects of glutaminase (GLS) inhibition on 3-phosphoglycerate levels in HT1080 cells. Quantification of 3-phosphoglycerate levels using GC-MS in HT1080 cells treated with DMSO, 300  $\mu$ M Zaprinst, or 10  $\mu$ M BPTES. Values were normalized first to total protein and then to DMSO treatment group to obtain relative metabolite levels (n=4, error bars represent S.D.).
